# Supplementary material for: Quantitative Approach to Explore Regulatory T Cell Activity in Immuno-Oncology
Source: Preprints.org preprint supplement (doi:10.20944/preprints202410.0325.v1), 2024-10-04
Supplement: Supplementary file 1 [file supplementary]

**Supplementary Material**

**Table S1**. Classification of Treg cells based on the expression of biomarkers [1–3].

| **Treg cell subset** | **Immune profile** | **Immune response**  **(antitumor)** | **Mechanism of action** |
| --- | --- | --- | --- |
| Non-Treg | *CD25lowCD45RA−FOXP3low* | Activator | Activated effector T cells expressing transiently CD25 and Foxp3. |
| Naive Treg | *CD25lowCD45RA+FOXP3low* | None | Naive without activation and/or differentiation. |
| iTreg | *CCR4+CCR8+FOXP3hi* | Suppressor | Tumor-infiltrating Treg promoted by chemokine pathway activation. |
| *CD4+CD25+CTLA-4+GITR+* | Treg highly immune-suppressive activity into TME. |
| pTreg | *Helios− Tigit− Treg* | Activator | Unstable peripheral Treg population whose phenotype may drift towards a CD8+ profile with antitumor activity. |

[1] W. Liu, A.L. Putnam, Z. Xu-yu, G.L. Szot, M.R. Lee, S. Zhu, P.A. Gottlieb, P. Kapranov, T.R. Gingeras, B.F. de St. Groth, C. Clayberger, D.M. Soper, S.F. Ziegler, J.A. Bluestone, CD127 expression inversely correlates with FoxP3 and suppressive function of human CD4+ T reg cells, J. Exp. Med. 203 (2006) 1701–1711. https://doi.org/10.1084/jem.20060772.

[2] and R.B. van B. Hongmei Cao, Rui Yu, Yi Tao, Dejan Nikolic, R. Jones, A Special Population of Regulatory T Cells Potentiates Muscle Repair, Bone. 23 (2005) 1–7. https://doi.org/10.1016/j.cell.2013.10.054.A.

[3] T. Ley, R. Browne, J. Abrams, R. Gonzalez, L. Bussell, M. Padron, F. Valles, The development and implementation of a precast bridge deck overhang system, 3rd Int. Fib Congr. Exhib. Inc. PCI Annu. Conv. Bridg. Conf. Think Glob. Build Locally, Proc. 15 (2010) 930–939. https://doi.org/10.1038/nm.2002.Fat.
